# Supplementary material for: Layered tungsten-based composites and their pseudocapacitive and electrocatalytic performance
Source: Royal Society of Chemistry journal article supplement (doi:10.1039/d1qm00678a), 2022-01-01
Supplement: d1qm00678a1.pdf [file d1qm00678a1.pdf]

1 Layered Tungsten-Based Composites and Their Pseudocapacitive and Electrocatalytic Performance  
2 Oluwafunmilola Ola<sup>a\*</sup>, Kunyapat Thummavichai<sup>b</sup>, Yu Chen<sup>c</sup>, Nannan Wang<sup>b</sup>, Qijian Niu<sup>d</sup>, Jiaao Wang<sup>e</sup>  
3 Shibin Sun<sup>f</sup> and Yanqiu Zhu<sup>c</sup>

4 <sup>a</sup>Faculty of Engineering, The University of Nottingham, University Park, Nottingham, NG7 2RD, United  
5 Kingdom

6 <sup>b</sup>Guangxi Institute Fullerene Technology (GIFT), Key Laboratory of New Processing Technology for  
7 Nonferrous Metals and Materials, Ministry of Education, School of Resources, Environment and  
8 Materials, Guangxi University, Nanning, 530004, China

9 <sup>c</sup>College of Engineering, Mathematics and Physical Sciences, University of Exeter, EX4 4QF, UK

10 <sup>d</sup>School of Agricultural Equipment Engineering, Jiangsu University, Zhenjiang, Jiangsu, 212013, China

11 <sup>e</sup>School of Material Science and Engineering, University of Jinan, Jinan, 250022, China

12 <sup>f</sup>College of Logistics Engineering, Shanghai Maritime University, Shanghai 201306, China

13 \*Corresponding author. Tel: +44 1157 487264. E-mail: [Oluwafunmilola.Ola1@nottingham.ac.uk](mailto:Oluwafunmilola.Ola1@nottingham.ac.uk)

#### 14 Supporting Information:

15 Table S1: Summary of atomic percentage of all samples based on the intensities of W 4f, S 2p, N 1s, C  
16 1s and O 1s determined by XPS analysis.

| Samples | Surface composition (Atomic %) |      |       |       |       | Atomic ratio  |                                  |               |                                         |
|---------|--------------------------------|------|-------|-------|-------|---------------|----------------------------------|---------------|-----------------------------------------|
|         | W 4f                           | S 2p | N 1s  | O 1s  | C 1s  | N 1s/<br>C 1s | N (C=N-C)/<br>N-(C) <sub>3</sub> | W 4f/<br>S 2p | WO <sub>3</sub><br>/<br>WS <sub>2</sub> |
| WS_400  | 0.85                           | 0.43 | 17    | 9.74  | 71.98 | 0.24          | 1.99                             | 1.98          | 4.62                                    |
| WS_600  | 1.18                           | 1.01 | 11.78 | 11.35 | 74.68 | 0.16          | 1.78                             | 1.17          | 1.35                                    |
| WS_800  | 0.55                           | 0.21 | 4.11  | 31.91 | 63.22 | 0.08          | 0.73                             | 2.61          | 1.19                                    |

17

18 Table S2: Performance comparison of different tungsten-based supercapacitors.

| Electrode materials                               | Specific capacitance (F g <sup>-1</sup> ) | Performance retention (%) | Reference |
|---------------------------------------------------|-------------------------------------------|---------------------------|-----------|
| W <sub>2</sub> C/WS <sub>2</sub>                  | 1018                                      | 94% @ 5000 cycles         | [26]      |
| WS <sub>2</sub> @NiCo <sub>2</sub> O <sub>4</sub> | 770                                       | 86% @ 5000 cycles         | [27]      |
| WS <sub>2</sub> QDs                               | 457                                       | 81% @ 8000 cycles         | [29]      |
| WS <sub>2</sub> /PEDOT                            | 71                                        | 90.7% @ 5000 cycles       | [28]      |
| WS <sub>2</sub> /ACF                              | 238                                       | 90.5% @ 1000 cycles       | [30]      |
| WC@GNF                                            | 1010                                      | 106% @ 2000 cycles        | [32]      |
| WNFs-3                                            | 588                                       | 95.5% @ 5000 cycles       | [31]      |
| WS_600                                            | 1156                                      | 82% @ 10,000 cycles       | This work |

19

20

21 Table S3: Comparison of the HER performance for different tungsten-based electrodes.

| Electrode materials              | Electrolyte concentration (mol L <sup>-1</sup> ) | Potential at -10 mA cm <sup>-2</sup> (V vs. RHE) | Tafel slope (mV dec <sup>-1</sup> ) | Reference |
|----------------------------------|--------------------------------------------------|--------------------------------------------------|-------------------------------------|-----------|
| W <sub>2</sub> C/WS <sub>2</sub> | 0.5M H <sub>2</sub> SO <sub>4</sub>              | 0.130                                            | 70                                  | [26]      |
| 20WZ-800                         | 0.5M H <sub>2</sub> SO <sub>4</sub>              | 0.250                                            | 64                                  | [34]      |
| WS <sub>2</sub>                  | 0.5M H <sub>2</sub> SO <sub>4</sub>              | 0.125                                            | 60                                  | [35]      |
| W-CoP                            | 0.5M H <sub>2</sub> SO <sub>4</sub>              | 0.048                                            | 56                                  | [36]      |
| Pt/def-WO <sub>3</sub> @CFC      | 0.5M H <sub>2</sub> SO <sub>4</sub>              | 0.042                                            | 60                                  | [37]      |
| WO <sub>x</sub> S <sub>y</sub>   | 0.5M H <sub>2</sub> SO <sub>4</sub>              | 0.103                                            | 54                                  | [38]      |
| 20% WS <sub>x</sub> @OMC         | 0.5M H <sub>2</sub> SO <sub>4</sub>              | 0.213                                            | 74                                  | [1]       |
| WS_600                           | 0.5M H <sub>2</sub> SO <sub>4</sub>              | 0.170                                            | 59                                  | This work |

22

23

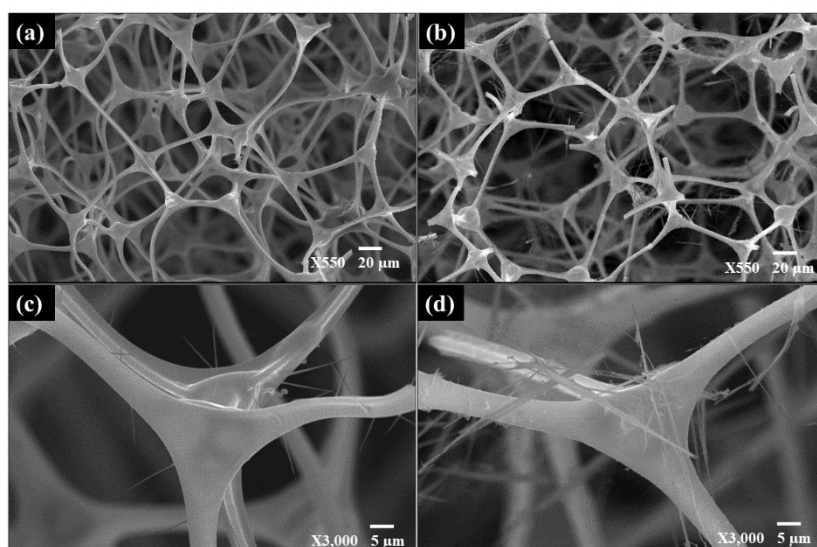

24

25 Figure S1: Low magnification SEM images of WS<sub>400</sub> (a, c), and WS<sub>600</sub> (b, d).

26

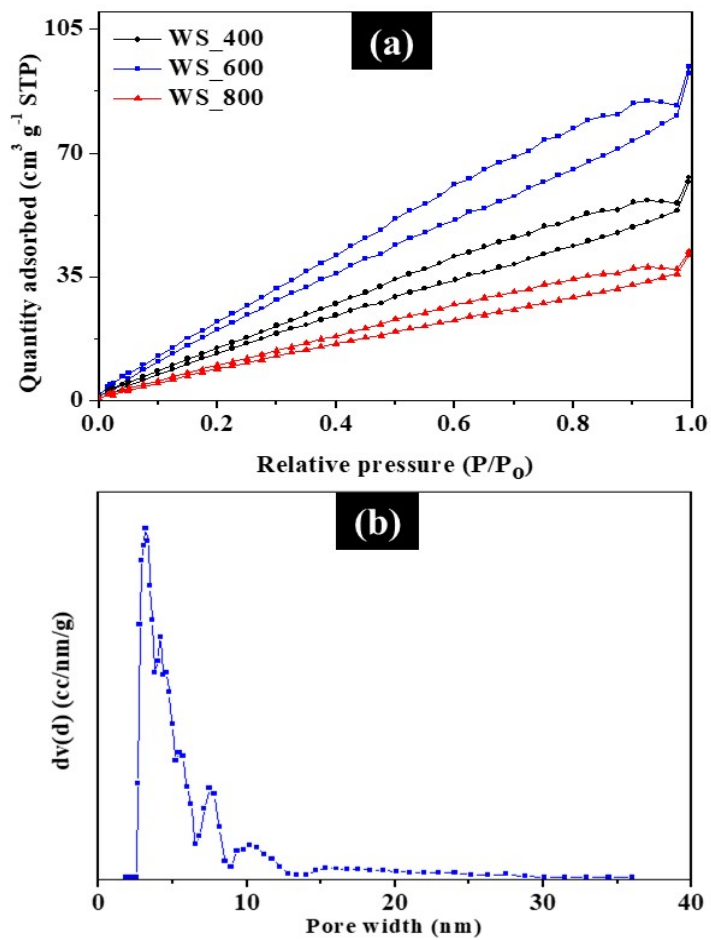

27

28 Figure S2. (a) Nitrogen adsorption-desorption isothermal curves of of WS<sub>2</sub> - g-C<sub>3</sub>N<sub>4</sub> composites and (b)  
 29 pore size distribution of WS<sub>600</sub>.

30

31

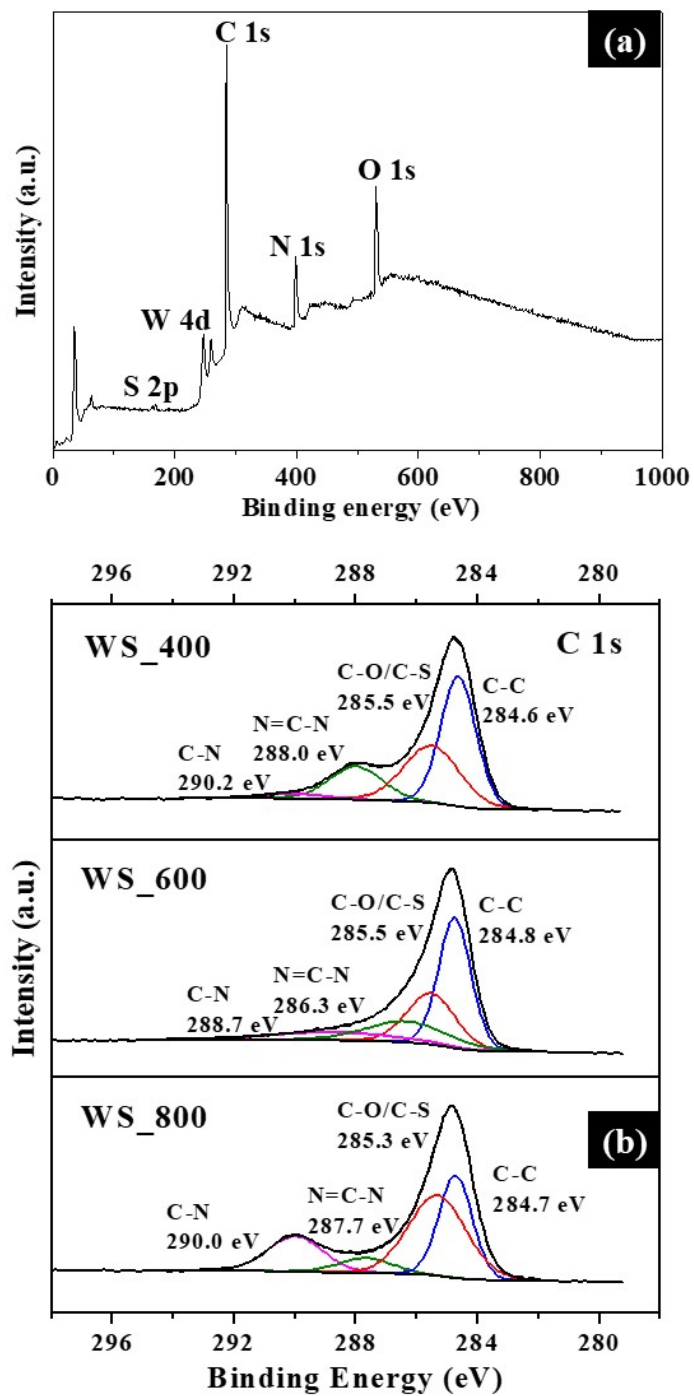

32

33 Figure S3. (a) XPS survey spectrum of the WS<sub>2</sub>-g-C<sub>3</sub>N<sub>4</sub> and (b) C 1s spectra of WS<sub>2</sub>-g-C<sub>3</sub>N<sub>4</sub> composites.

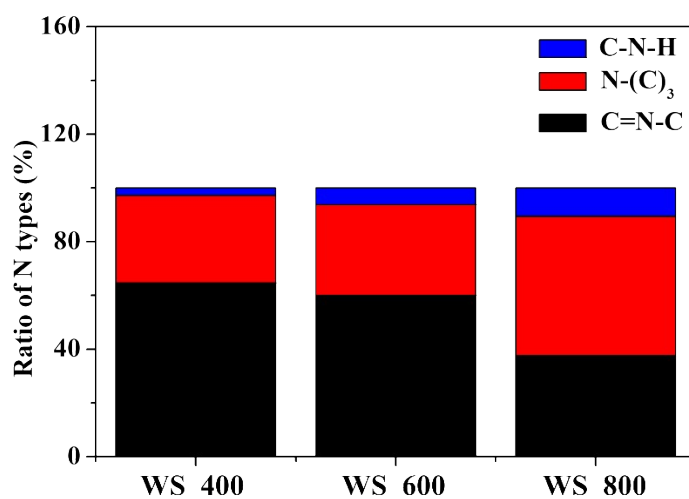

34

35 Figure S4. Ratio of different nitrogen types determined from XPS analysis

36

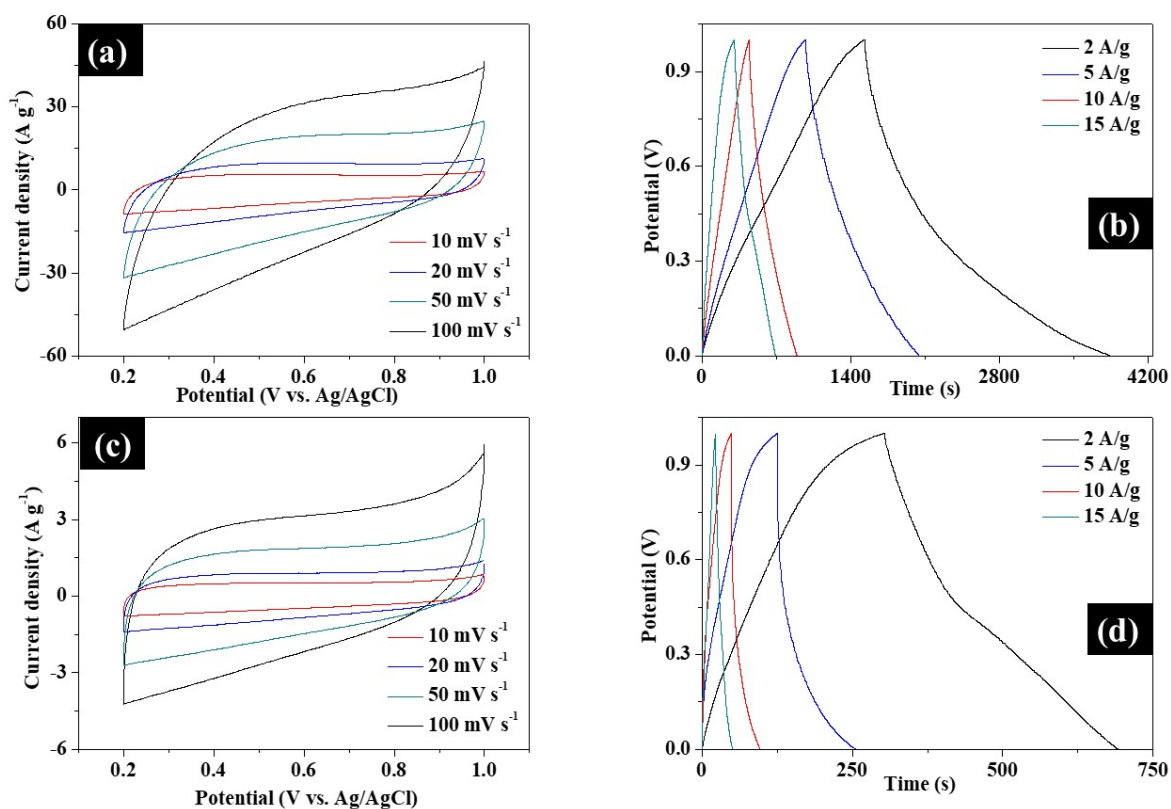

37

38 Figure S5. Electrochemical characterization (a) CV curves at various scan rates of WS\_800 from 10 to  
 39 100  $\text{mV s}^{-1}$ , (b) Galvanostatic charge discharge curves of WS\_800 at different current densities, c) CV  
 40 curves at various scan rates of WS\_400 from 10 to 100  $\text{mV s}^{-1}$  and (d) Galvanostatic charge discharge  
 41 curves of WS\_400 at different current densities.

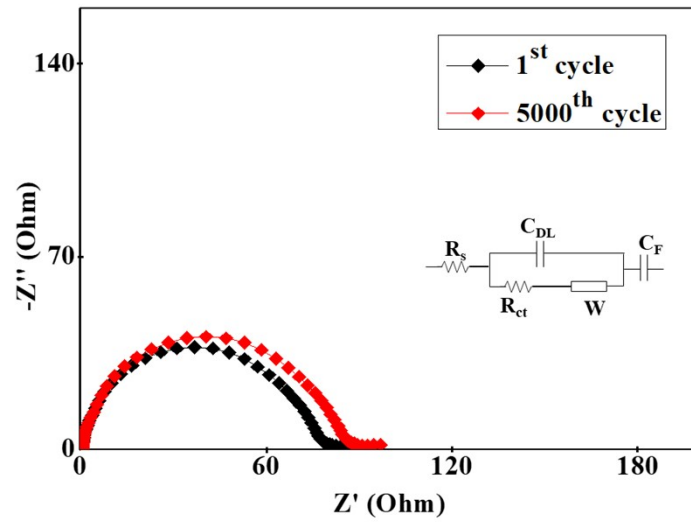

42

43 Figure S6. Nyquist plots of WS\_600 before and after 5000 cycles with the corresponding equivalent  
 44 circuit inset ( $R_{ct}$  - charge transfer resistance,  $C_{DL}$  - electrical double-layer capacitance,  $R_s$  - solution  
 45 resistance,  $W$  - Warburg impedance and  $C_F$  - Faradaic capacitance).

46

47
